# Supplementary material
Source: PubMed Central journal article supplement (PMC9946126)
Supplement: NIHMS1837809-supplement-supinfo.pdf [file NIHMS1837809-supplement-supinfo.pdf]

# Supplementary Material: Iron Based Coupling Media (IBCM) for MRI-Guided Ultrasound Surgery

## Authors

Steven P Allen<sup>1</sup>, Austin Fergusson<sup>2</sup>, Connor Edsall<sup>3</sup>, Sheng Chen<sup>4</sup>, David Moore<sup>5</sup>, Eli Vlaisavljevich<sup>2,3</sup>, Richey M Davis<sup>6</sup>, Craig H Meyer<sup>4,7</sup>

1. *Department of Electrical and Computer Engineering, Brigham Young University, Provo, UT, USA*
2. *Graduate Program in Translational Biology, Medicine, and Health, Virginia Tech, Blacksburg, VA, USA*
3. *Department of Biomedical Engineering and Mechanics, Virginia Tech, Blacksburg, VA, USA*
4. *Department of Biomedical Engineering, University of Virginia, Charlottesville, VA, USA*
5. *The Focused Ultrasound Foundation, Charlottesville, VA, USA*
6. *Department of Chemical Engineering, Virginia Tech, Blacksburg, VA, USA*
7. *Department of Radiology and Medical Imaging, University of Virginia, Charlottesville, VA, USA*

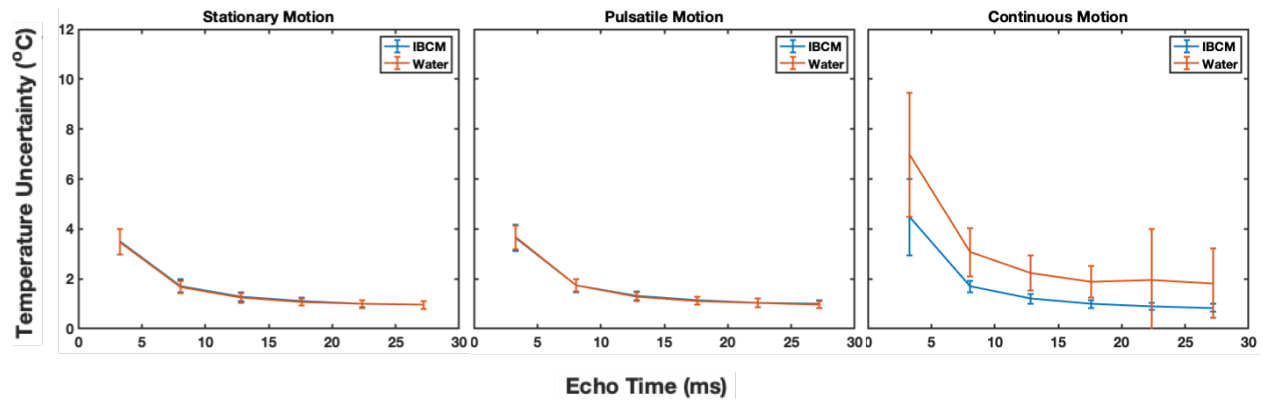

Supplemental Figure S-1. Mean and standard deviation of the temperature uncertainty values within the bounding box shown in Figure 3 computed for each echo time. Temperature uncertainty increases when the water coupling medium is in the continuous motion state.

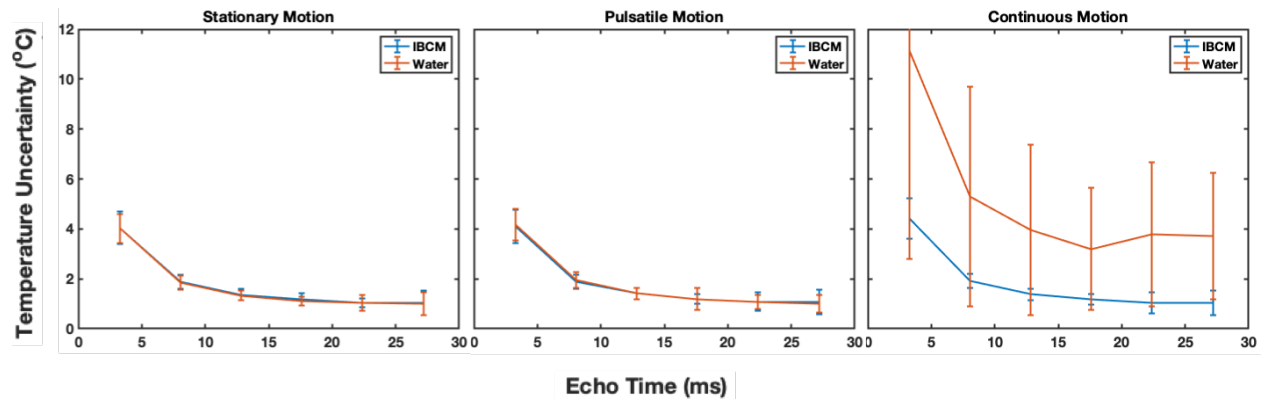

Supplemental Figure S-2. Mean and standard deviation of the temperature uncertainty values within the bounding box shown in Figure 3 computed for each echo time. Temperature uncertainty increases when the water coupling medium is in the continuous motion state.

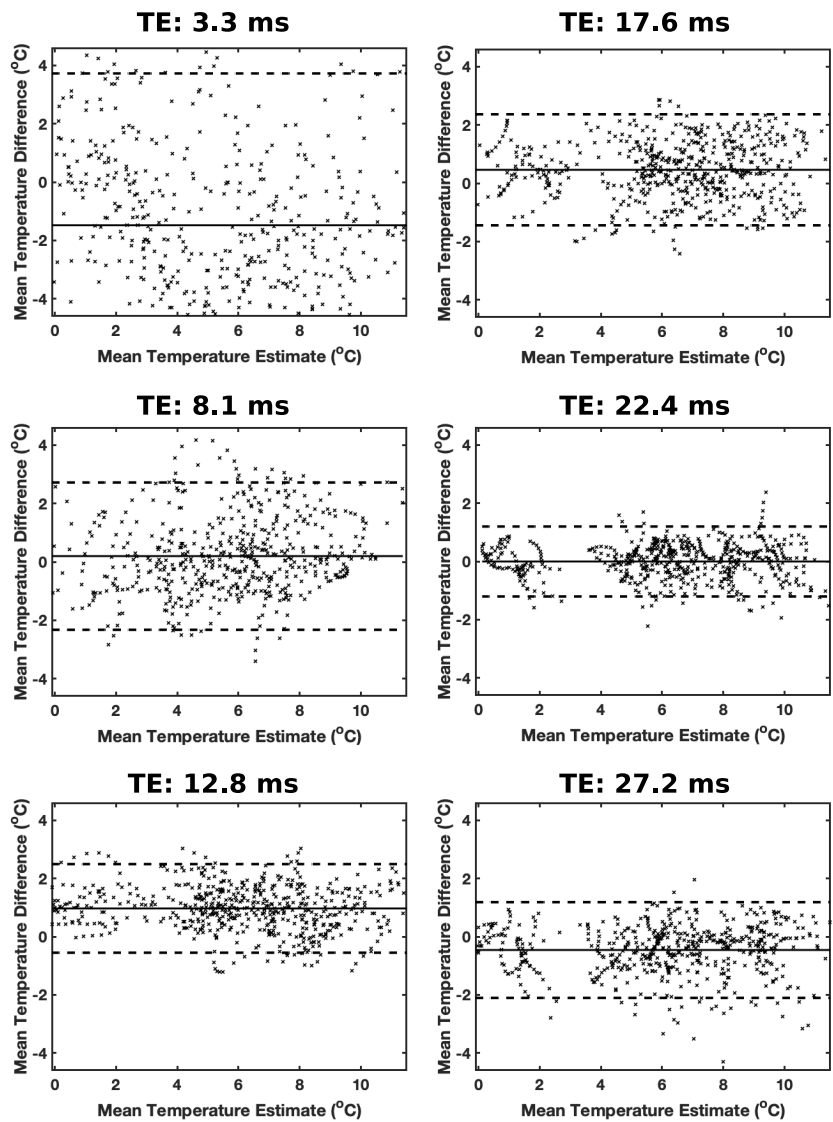

Supplemental Figure S-3. Bland-Altman plots comparing temperature estimates using water and the IBCM at 12 co-registered pixels at the treatment focus. Temperatures are computed for each echo time.

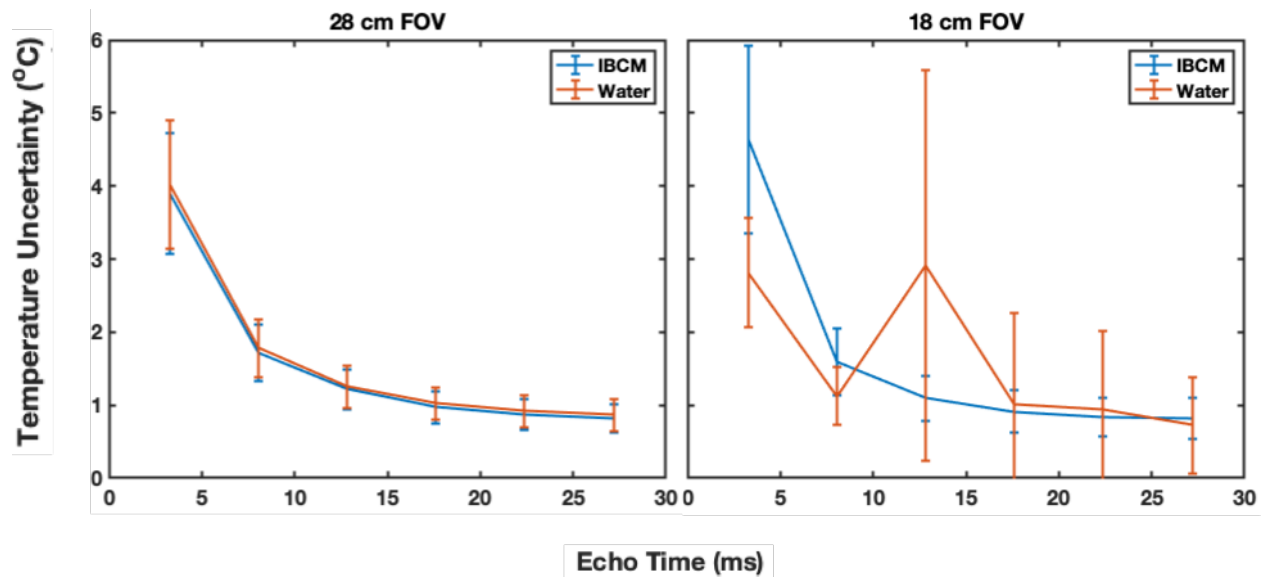

Supplemental Figure S-4. Mean and standard deviation of the temperature uncertainty values within the bounding box shown in Figure 3 computed for each echo time. Temperature uncertainty increases when water is used as the coupling medium and the field of view is reduced to 18 cm.

|                                          | Odeen et al. <sup>21</sup> | Grissom and Allen <sup>20</sup>    | Ma et al. <sup>19</sup> | Allen et al. <sup>15</sup> | Current Study       |
|------------------------------------------|----------------------------|------------------------------------|-------------------------|----------------------------|---------------------|
| Thermometry Method                       | 3D, Single Echo, GRE       | 2D, Single Echo, GRE, Undersampled | Not Reported            | 2D, Multi-Echo, GRE        | 2D, Multi-Echo, GRE |
| Medium Motion State                      | Continuous                 | Pulsatile                          | Not Reported            | Continuous                 | Pulsatile           |
| Medium Suppression Method                | Saturation Pulses          | 2D RF Excitation                   | Heavy Water             | Commercial IBCM            | Custom IBCM         |
| Medium Suppression Efficacy (%)          | Not Reported               | Not Reported                       | Not Quantified          | 75% TSE Scans              | >400 for TSE scans  |
| Thermometry Uncertainty Improvement (°C) | 1.11                       | 6                                  | Not Reported            | Not Reported               | 0.51                |
| Thermometry Accuracy (°C)                | Not Reported               | ±1                                 | Not Reported            | ±3                         | 0.5                 |

Supplemental Table S-2. Comparison in methods and results between this study and previously published methods to reduce coupling-media-induced guidance imaging errors. Differences in methodologies make direct comparison difficult.
